# Supplementary material for: Placental growth factor gene silencing mitigates the epithelial-to-mesenchymal transition via the p38 MAPK pathway in rats with hyperoxia-induced lung injury
Source: PubMed Central journal article supplement — Mol Med Rep. 2019 Oct 30;20(6):4867–74. doi: 10.3892/mmr.2019.10785 (PMC6854522; doi:10.3892/mmr.2019.10785), 2019-10-30

Figure S1. Expression of PLGF and E-cadherin in hyperoxia-exposed lung tissue. Neonatal rats were exposed to normoxic or hyperoxic conditions for 14 days; hyperoxia exposed rats were subsequently injected with shRNA-NC or shRNA-PLGF. (A) PLGF positive cells in rat lung tissues (B) E-cadherin positive cells in rat lung tissues. Data are presented as the mean  $\pm$  standard deviation. n=3. \*\*P<0.01. PLGF, placental growth factor; NC, negative control; E-cadherin, epithelial cadherin; shRNA, short hairpin RNA.

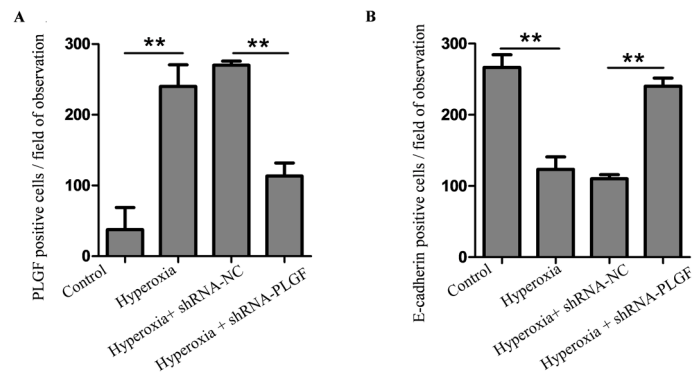

Supplement: Supplementary_Data.pdf [file Supplementary_Data.pdf]
